# Supplementary material
Source: MDPI journal article supplement (https://www.mdpi.com/2071-1050/14/15/9241)
Supplement: s1 [file s1]

Archive with 2 entries (2 files):
- The Relationships between Urbanization, Altitude Variability and Disaster Risk Management, Evidence from Jordan_ File S1.pdf
- The Relationships between Urbanization, Altitude Variability and Disaster Risk Management, Evidence from Jordan_ File S2.pdf
