# Supplementary material
Source: MDPI journal article supplement (https://www.mdpi.com/2071-1050/14/15/9241)
Supplement: s1 [file s1 › The Relationships between Urbanization, Altitude Variability and Disaster Risk Management, Evidence from Jordan_ File S2.pdf]

**File S2. Detailed maps of the study:**

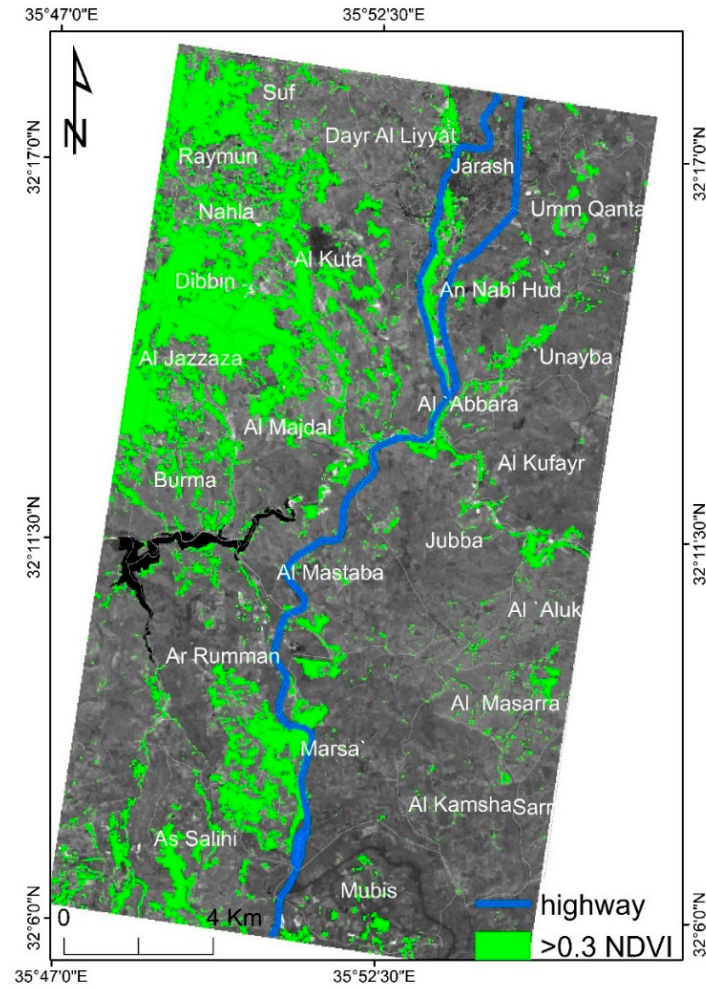

Figure S1. NDVI map of the study area for the year 1994.

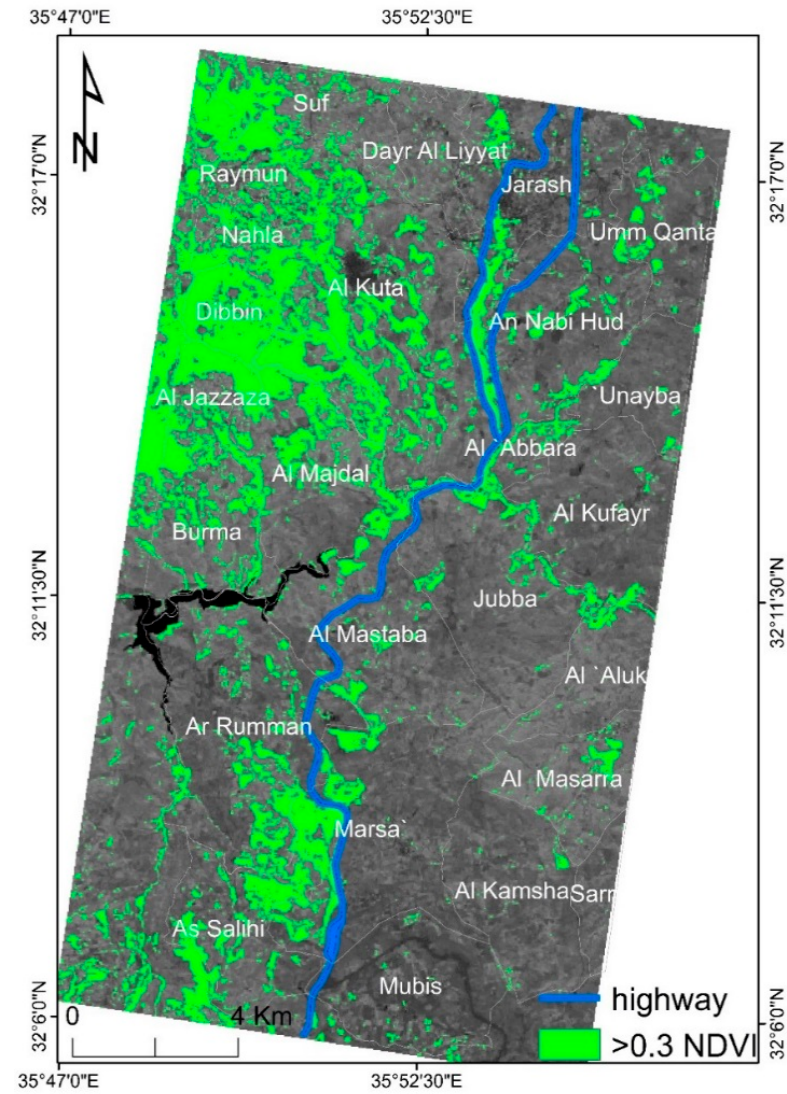

Figure S2. NDVI map of the study area for the year 2004.

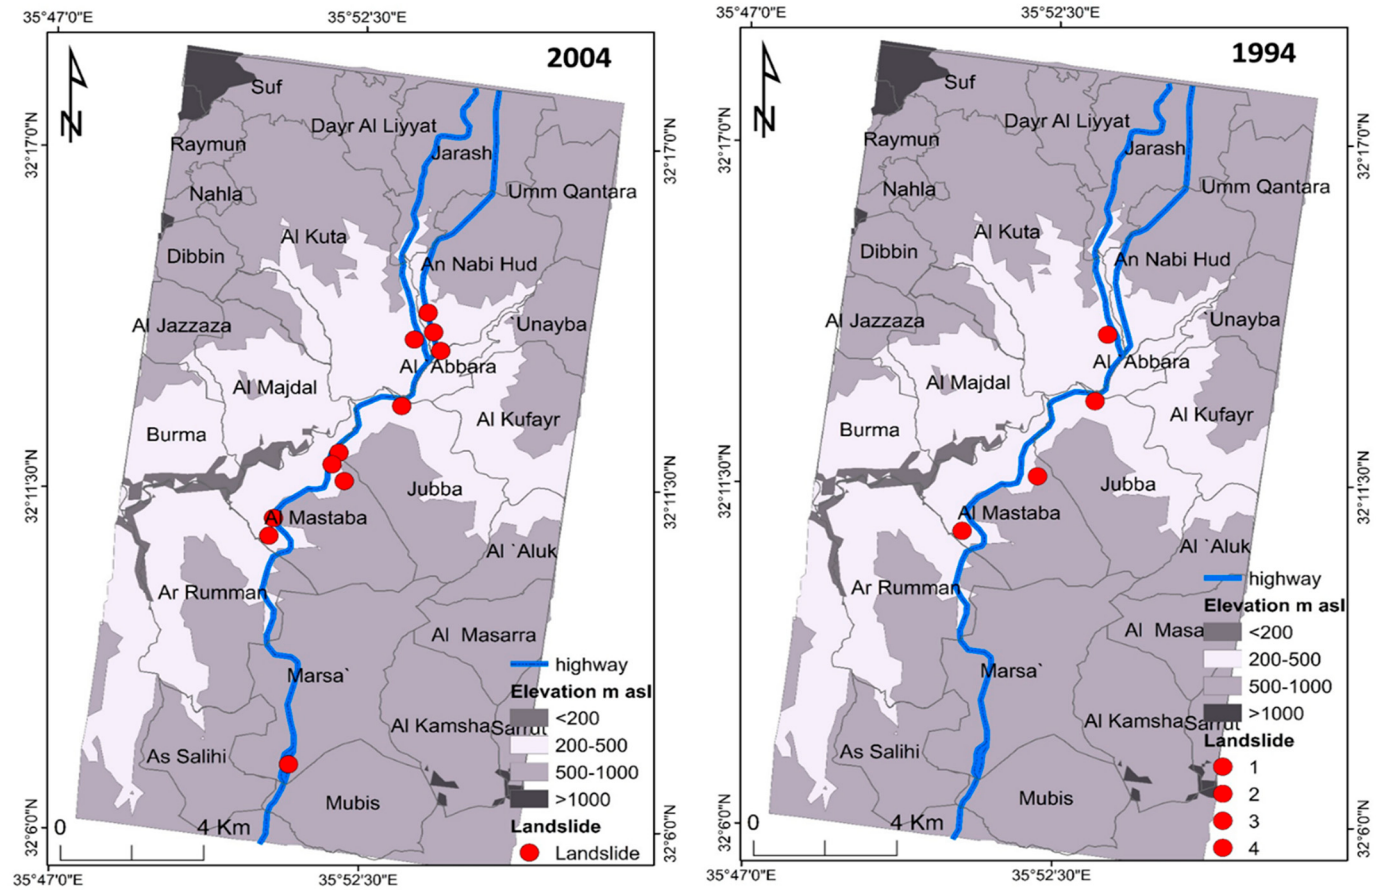

Figure S3. Landslide locations for the years 1994/2004 (for data sources see the main text), superimposed on DEM data.

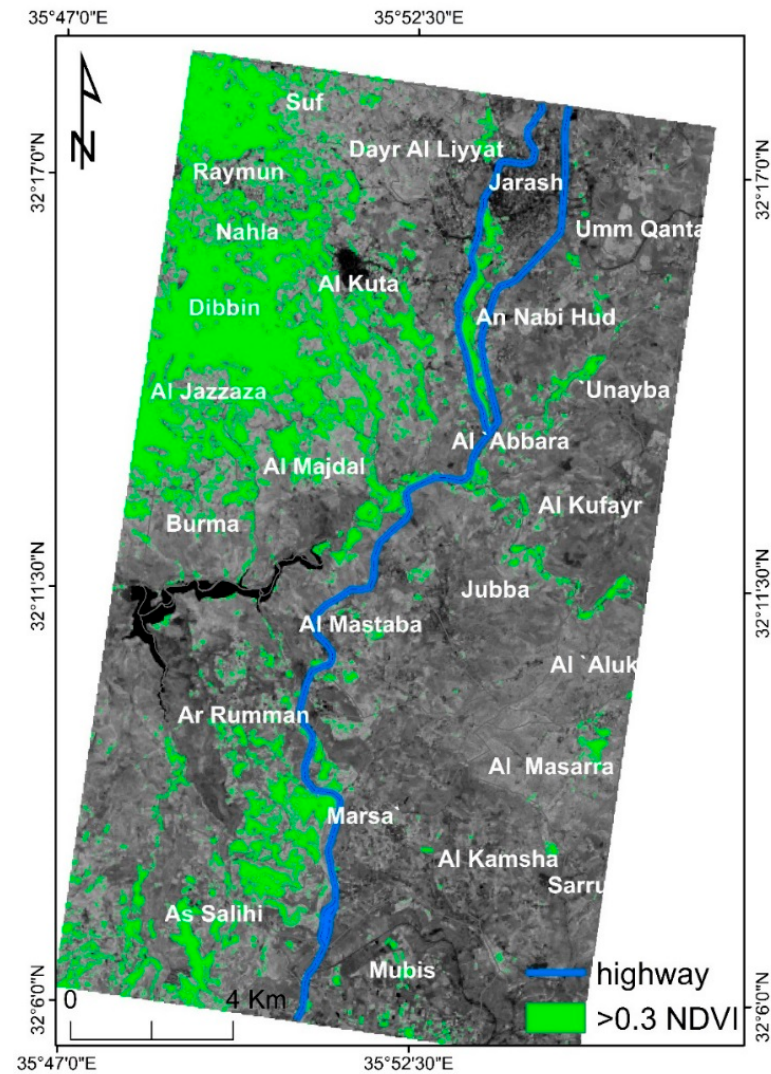

Figure S4. NDVI map of the study area for the year 2015.

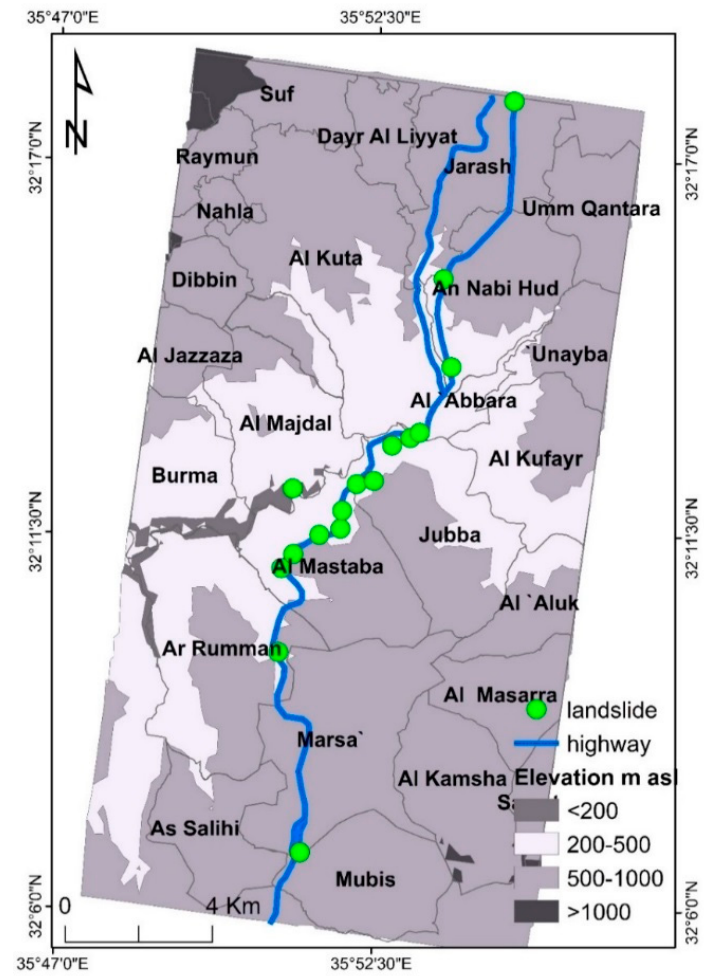

Figure S5. Landslide locations for the year 2015 (for data sources see the main text), superimposed on DEM data.

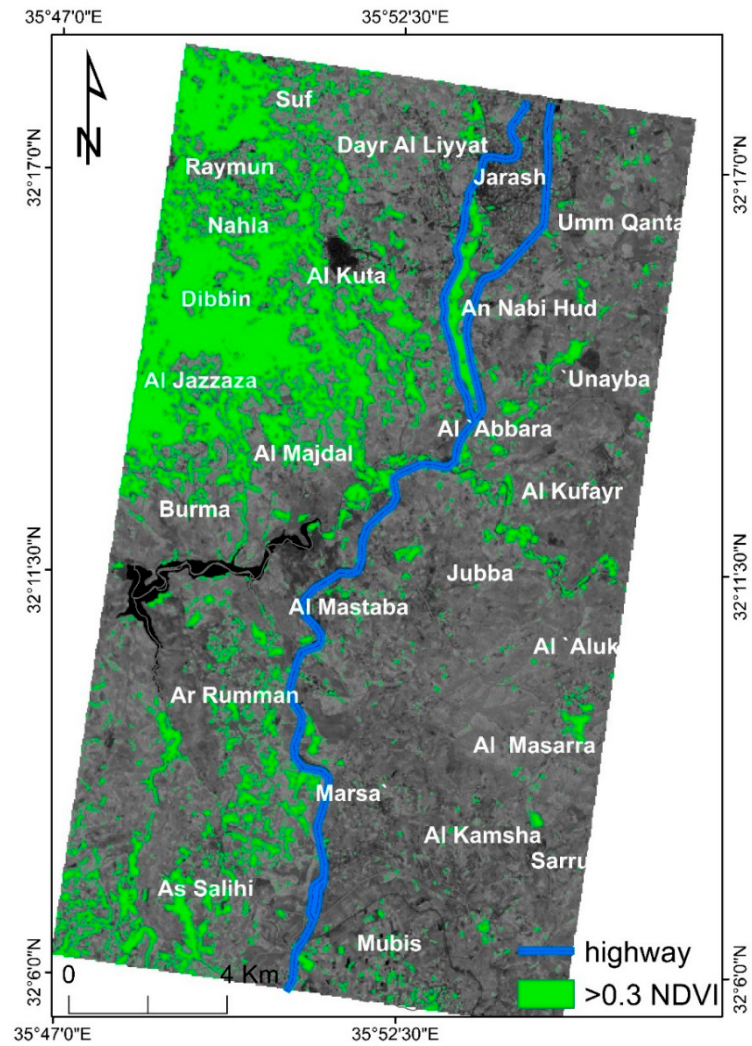

Figure S6. NDVI map of the study area for the year 2020.

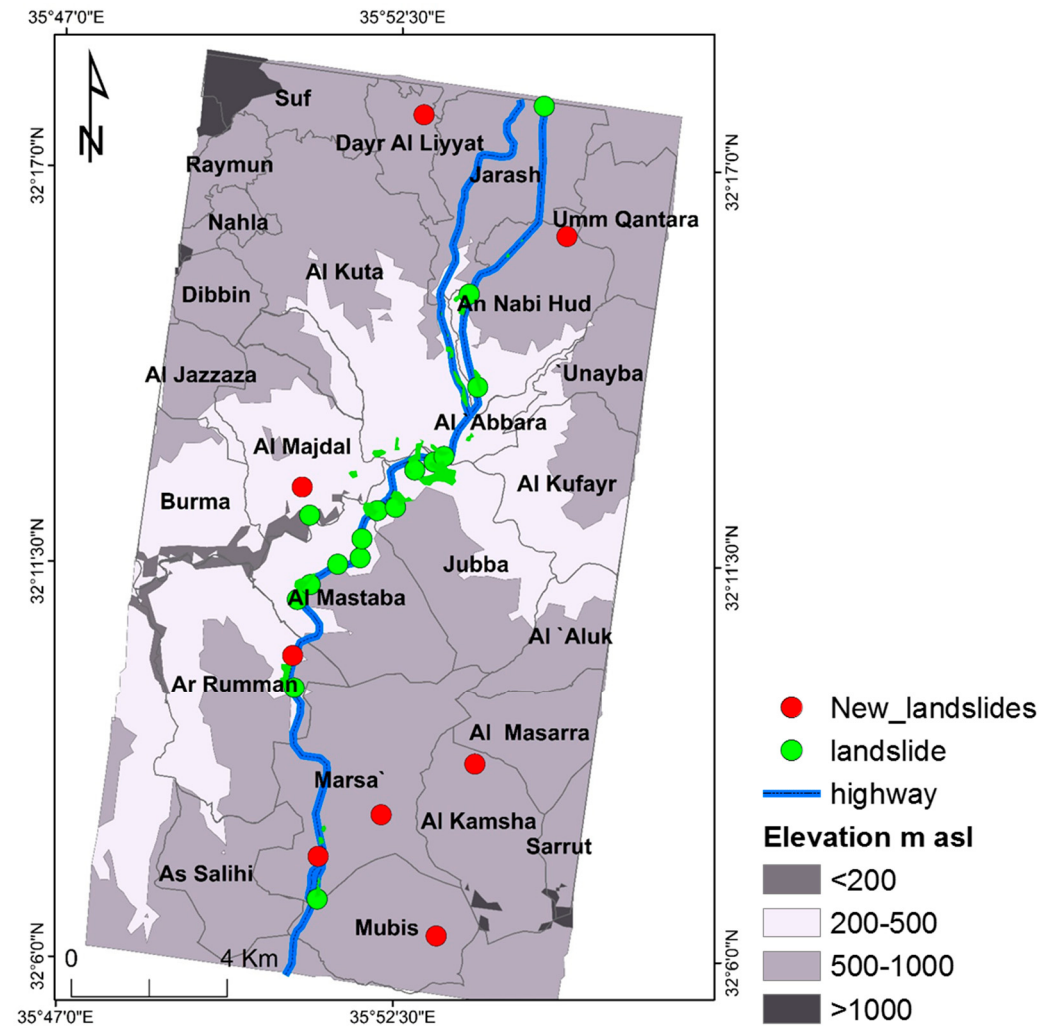

Figure S7. Landslide locations for the year 2020 (for data sources see the main text), superimposed on DEM data.

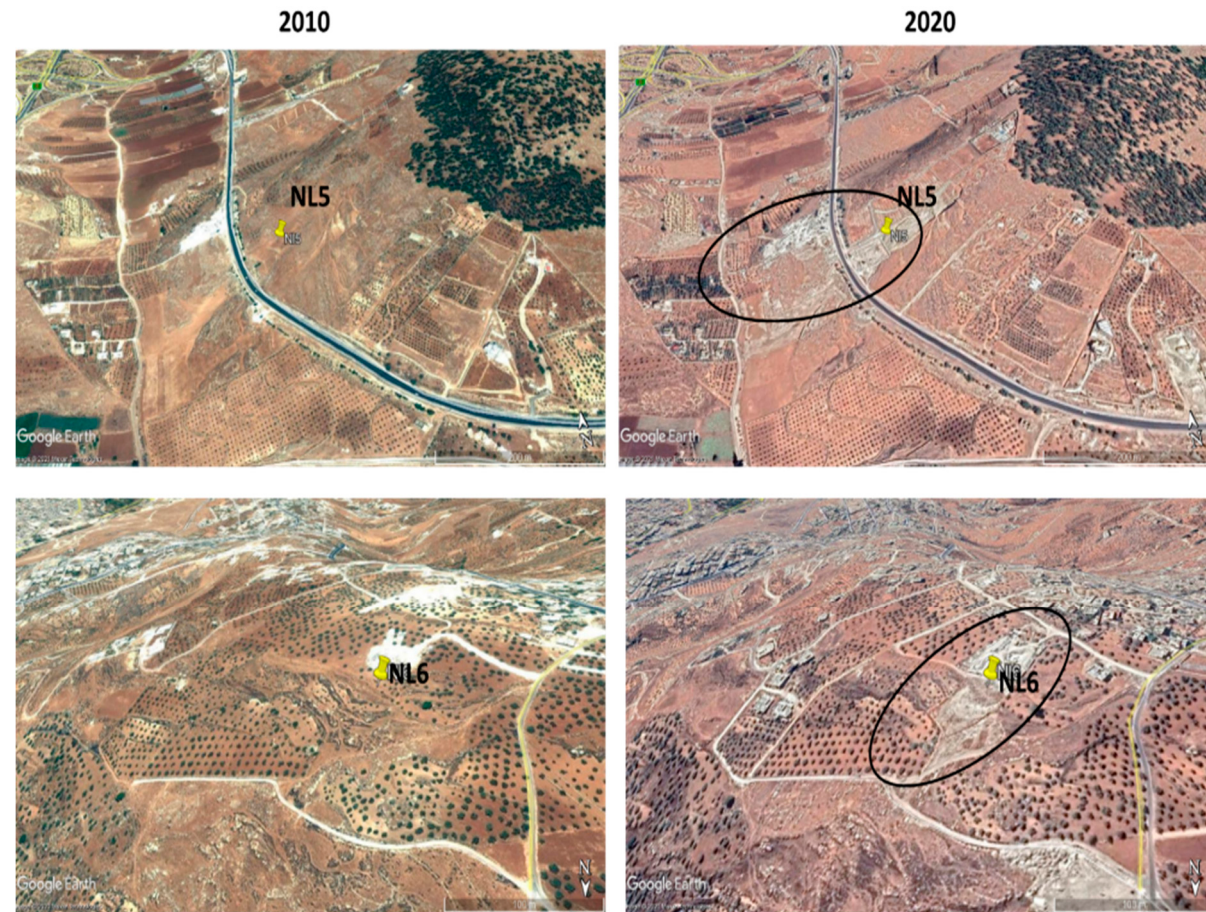

Figure S8. New Landslide (NL) 5 and 6 events recovered from the fieldtrip and Google Earth survey. Also showing the landscape change over a period of 10 years (2010-2020).

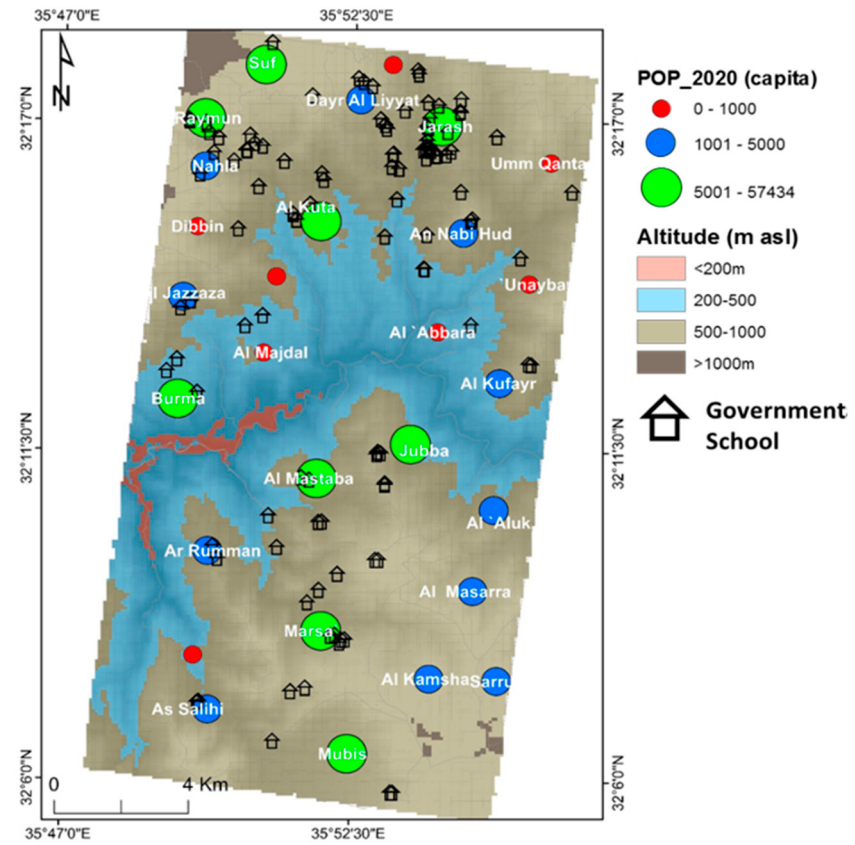

Figure S9. Schools spatial distribution in the study area and population densities superimposed on the DEM.

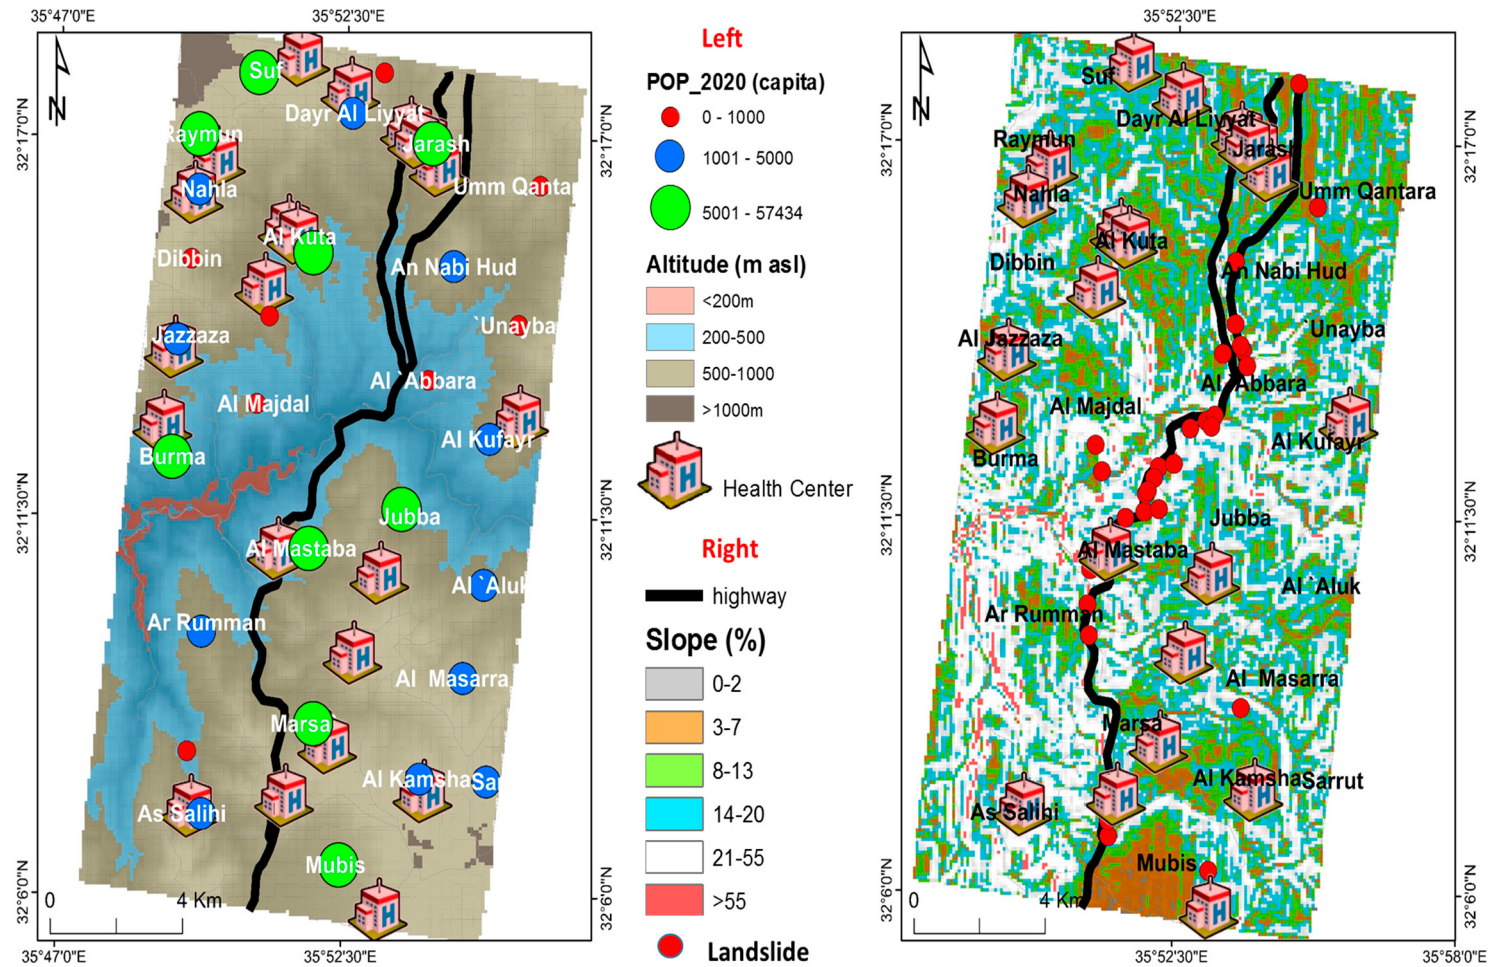

Figure S10. Left: Health Centers spatial distribution in the study area superimposed on the DEM. Right: Health Centers spatial distribution in the study area and landslide locations superimposed on the slope map.

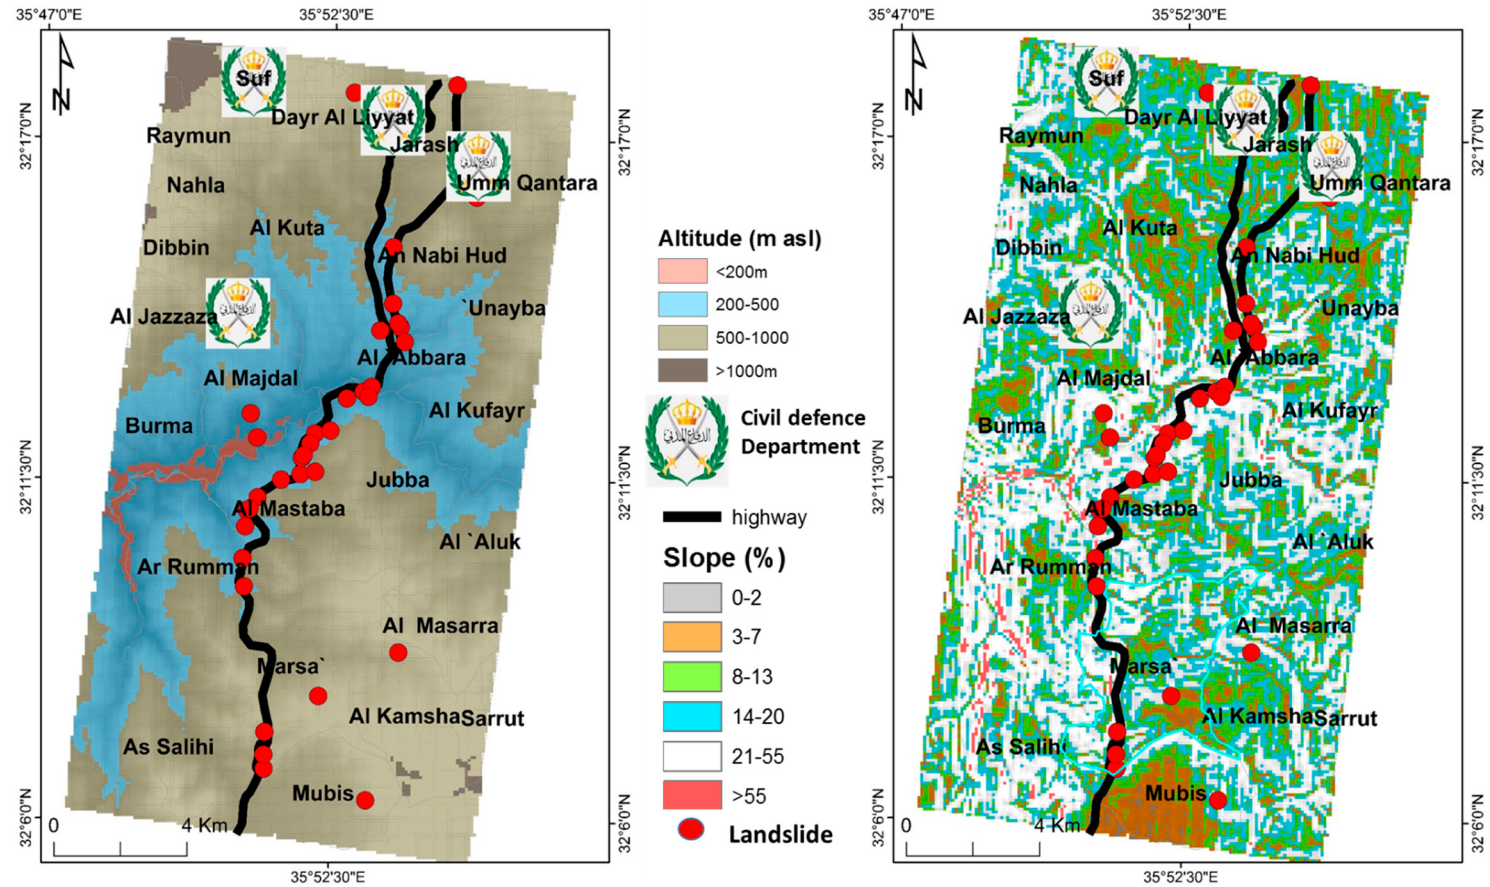

Figure S11. Left: Civil Defense departments spatial distribution in the study area superimposed on the DEM. Right: Civil Defense departments' spatial distribution in the study area and landslide locations superimposed on the slope map.
